# Supplementary material for: Tailoring and Evaluating Treatment with the Patient-Specific Needs Evaluation: A Patient-Centered Approach
Source: PubMed Central journal article supplement (PMC11412570; doi:10.1097/prs.0000000000011199), 2023-12-12
Supplement: prs-154-0787-s001.pdf [file prs-154-0787-s001.pdf]

| Main categories                                                  | Findings                                                                                                  | Quotes                                                                                                                                                                                                                                                                                         |
|------------------------------------------------------------------|-----------------------------------------------------------------------------------------------------------|------------------------------------------------------------------------------------------------------------------------------------------------------------------------------------------------------------------------------------------------------------------------------------------------|
| <b>1: Relevance</b>                                              | 1.1: Most participants found it relevant that their answers could direct the conversation                 | 1.1.1 "I think it's important for a doctor to know that in advance. Know what the situation is" (P1)<br>1.1.2 "easy to give direction to the conversation" (P1)<br>1.1.3 "Time efficient" (P2)                                                                                                 |
|                                                                  | 1.2: Most participants found it relevant that the clinician could respond to expectations                 | 1.2.1 "If you absolutely want to reach a 10, that says something about you" (P1)<br>1.2.2 "it is easier for the doctor to estimate the patient's expectations" (P3)<br>1.2.3 "I can imagine that it is nice for the practitioner to already know what someone would most like to improve" (P4) |
|                                                                  | 1.3: Some participants felt well prepared and empowered by filling in the questionnaire                   | 1.3.1 "Yes, also nice for myself to already think about what I would like to know during such a first intake, for example" (P5)<br>1.3.2 "You feel that you are taken seriously" (P6)                                                                                                          |
| <b>2: Completeness: information need</b>                         | 2.1 Some participants seem worried about whether the clinician would answer all their questions           | 2.1.1 FIELD NOTES                                                                                                                                                                                                                                                                              |
|                                                                  | 2.2 Many participants deemed it impossible to choose just one answer option                               | 2.2.1 "To me, everything was important" (P2)<br>2.2.2 "asking multiple questions to arrive at an opinion" (P6)                                                                                                                                                                                 |
| <b>3: Completeness: treatment goal and improvement goal</b>      | 3.1 All participants thought the questions and answer options were complete                               | 3.1.1 "I believe everyone can find his or her complaint in here" (P7)<br>3.1.2 "Seems all right to me, yes, I can't see one missing" (P1)                                                                                                                                                      |
| <b>4: Understandability: introductory texts</b>                  | 4.1 Many participants thought the welcome text was too elaborate                                          | 4.1.1 "It could also be said in two sentences" (P7)<br>4.1.2 "Yes, just a good clear explanation" (P6)                                                                                                                                                                                         |
|                                                                  | 4.2 Some participants missed a sentence on how many options they were allowed to pick at 'treatment goal' | 4.2.1 "It literally says pick one" (P3)<br>4.2.2 "for some people I think it is annoying to have to focus on one thing again" (P3)                                                                                                                                                             |
| <b>5: Understandability: information need</b>                    | 5.1 Most participants found the question and answer options clear                                         | 5.1.1 "Give me a second... No, it's clear like this" (P8)                                                                                                                                                                                                                                      |
|                                                                  | 5.2 Some participants thought they couldn't answer the question without more information beforehand       | 5.2.1 "You can't really ask about treatment if a diagnosis has not yet been determined" (P3)                                                                                                                                                                                                   |
| <b>6: Understandability: treatment goal and improvement goal</b> | 6.1 Many participants thought the answer scale for pain was too complicated                               | 6.1.1 "You need to switch the scale" (P3)<br>6.1.2 "With smiley faces for people who think it is complicated" (P6)<br>6.1.3 "I would say 'unbearable pain' and 'no pain' instead of 'very bad' and 'excellent'" (P3)                                                                           |
|                                                                  | 6.2 Some participants found specific words in the domain section too complicated                          | 6.2.1 "Well, I didn't know what pliability was" (P2)                                                                                                                                                                                                                                           |
