# Supplementary material for: Tailoring and Evaluating Treatment with the Patient-Specific Needs Evaluation: A Patient-Centered Approach
Source: PubMed Central journal article supplement (PMC11412570; doi:10.1097/prs.0000000000011199), 2023-12-12
Supplement: prs-154-0787-s002.pdf [file prs-154-0787-s002.pdf]

| Main categories     | Findings                                                                                                                                               | Quotes                                                                                                                                                                                                                                                               |                                                                                                                                                                                                                                                                                                                                        |                                                                                                                                                                                                                                                                                                        |
|---------------------|--------------------------------------------------------------------------------------------------------------------------------------------------------|----------------------------------------------------------------------------------------------------------------------------------------------------------------------------------------------------------------------------------------------------------------------|----------------------------------------------------------------------------------------------------------------------------------------------------------------------------------------------------------------------------------------------------------------------------------------------------------------------------------------|--------------------------------------------------------------------------------------------------------------------------------------------------------------------------------------------------------------------------------------------------------------------------------------------------------|
| <b>1: Relevance</b> | 1.1 Many clinicians thought the open question for aid and the conversation itself provide enough information to understand what the patients needs are | 1.1.1 "you can just have this conversation and then you will get this information too" (C2)<br>1.1.2 "I'm quite satisfied with the information that we already have" (C4)                                                                                            |                                                                                                                                                                                                                                                                                                                                        |                                                                                                                                                                                                                                                                                                        |
|                     | 1.2 Some clinicians thought the questionnaire might help them to formulate a relevant treatment goal                                                   | 1.2.1 "I would definitely look it over and see what the patients goal was prior to their visit to the doctor. And of course I would discuss that with them, before coming here, your goal was this, is that still your goal or do you now want something else?" (C1) |                                                                                                                                                                                                                                                                                                                                        |                                                                                                                                                                                                                                                                                                        |
|                     | 1.3 Many clinicians thought it useful to know what the patients goal is to become satisfied with the treatment results                                 | 1.3.1 "If the expectations aren't realistic then I would use it. (...) If it is just regular, then I won't do much with it" (C4)<br>1.3.2 "you can filter out those extremes nicely"(C2)                                                                             |                                                                                                                                                                                                                                                                                                                                        |                                                                                                                                                                                                                                                                                                        |
|                     | 1.4 Some clinicians thought it useful that the patient fills in the questionnaire before the first consultation                                        | 1.4.1 "I actually think this is a good one, because the patient can tell his own story. So one is a little less likely to be overwhelmed by the opinion of a clinician" (C3)                                                                                         |                                                                                                                                                                                                                                                                                                                                        |                                                                                                                                                                                                                                                                                                        |
|                     | 1.5 Some clinicians thought it useful to have an image of the patient before the first consultation                                                    | 1.5.1 "It's interesting, by certain answers, you also get to see a kind of personality" (C5)                                                                                                                                                                         |                                                                                                                                                                                                                                                                                                                                        |                                                                                                                                                                                                                                                                                                        |
|                     | <b>2: Completeness: information need</b>                                                                                                               | 2.1 All clinicians think the part on information need is complete                                                                                                                                                                                                    | 2.1.1 "It's definitely complete, especially the first question" (C1)                                                                                                                                                                                                                                                                   |                                                                                                                                                                                                                                                                                                        |
|                     |                                                                                                                                                        | <b>3: Completeness: treatment goal and improvement goal</b>                                                                                                                                                                                                          | 3.1 Most clinicians think the part on the treatment goal is complete                                                                                                                                                                                                                                                                   | 3.1.1 "Yes, yes, I think it is fairly complete in terms of complaints" (C3)                                                                                                                                                                                                                            |
|                     | <b>4: Usability for the clinician</b>                                                                                                                  |                                                                                                                                                                                                                                                                      | 4.1 Barrier: Most clinicians are afraid the questionnaire will cost them more time                                                                                                                                                                                                                                                     | 4.1.1 "because of course you don't have forever to prepare so I'm not sure I would look at this" (C2)<br>4.1.2 "Example given, 'oh yes, I saw that you are a bricklayer or something' and then you immediately have a conversation and someone also has the feeling that his information is used" (C3) |
|                     |                                                                                                                                                        | 4.2 Risk: Some clinicians fear being biased                                                                                                                                                                                                                          | 4.2.1 "Well, I think I have to be very careful not to start with prejudices. Someone has discussed his profession and his complaints, so I'm already starting with a tunnel vision" (C3)<br>4.2.2 "And especially a conversation is dynamic. You can't put at person in a box" (C4)                                                    |                                                                                                                                                                                                                                                                                                        |
|                     |                                                                                                                                                        | 4.3 Risk: some clinicians fear that clinicians will only answer the most important answer                                                                                                                                                                            | 4.3.1 "If I look at it quickly, I could just be put on the wrong track when I see that they can only indicate one"<br>4.3.2 "You have to let therapists know that patients are only asked to only choose one answer" (C1)                                                                                                              |                                                                                                                                                                                                                                                                                                        |
|                     |                                                                                                                                                        | 4.4 Barrier: Some clinicians thought it hard to use the patients answer to the information need in their consult                                                                                                                                                     | 4.4.1 "And vice versa, you choose diagnosis and treatment, or advice and future, but that is usually also a multi-question" (C4)<br>4.4.2 "Yeah, I honestly don't know if I'll be using this when they can only choose one option, because then I know okay, they will ask more questions anyway. Do you understand what I mean?" (C2) |                                                                                                                                                                                                                                                                                                        |
|                     |                                                                                                                                                        | <b>5: Usability/ understandability for patients</b>                                                                                                                                                                                                                  | 5.1 All clinicians thought the answer scale to pain was too complicated                                                                                                                                                                                                                                                                | 5.1.1 "If you just use the same scale for everything and not a grade, because now I will be thinking, 'hey, a grade, okay, but I just entered something different; help, did I do that right?'" (C2)                                                                                                   |
|                     |                                                                                                                                                        |                                                                                                                                                                                                                                                                      | 5.2 Some clinicians think several words and questions are too hard for patients to understand                                                                                                                                                                                                                                          | 5.2.1 FIELD NOTE: suggestion to put answers in sentences (narrative mode) (C4, C5, C6)<br>5.2.2 "We have a certain level of intelligence, it's not that I feel elevated, but a majority of patients do not even understand some of the words" (C3)                                                     |
|                     |                                                                                                                                                        |                                                                                                                                                                                                                                                                      | 5.3 Some clinicians wonder whether the patient answers honestly                                                                                                                                                                                                                                                                        | 5.3.1 "All patients want their doctor to put maximum effort in it" (C5)<br>5.3.2 "But is that realistic?" (C1)                                                                                                                                                                                         |
|                     |                                                                                                                                                        |                                                                                                                                                                                                                                                                      | 5.4 Risk: many clinicians are afraid that patients have to answer too many overlapping questions                                                                                                                                                                                                                                       | 5.4.1 "Yes, you know, whatever, 'I already filled this in' and then you fill in the question differently than the other one. So then you give a score, you don't look at it carefully, while you might have done that other list very carefully" (C3)                                                  |
