# Supplementary material for: Tailoring and Evaluating Treatment with the Patient-Specific Needs Evaluation: A Patient-Centered Approach
Source: PubMed Central journal article supplement (PMC11412570; doi:10.1097/prs.0000000000011199), 2023-12-12

**A** Did you find the question about your information need understandable?

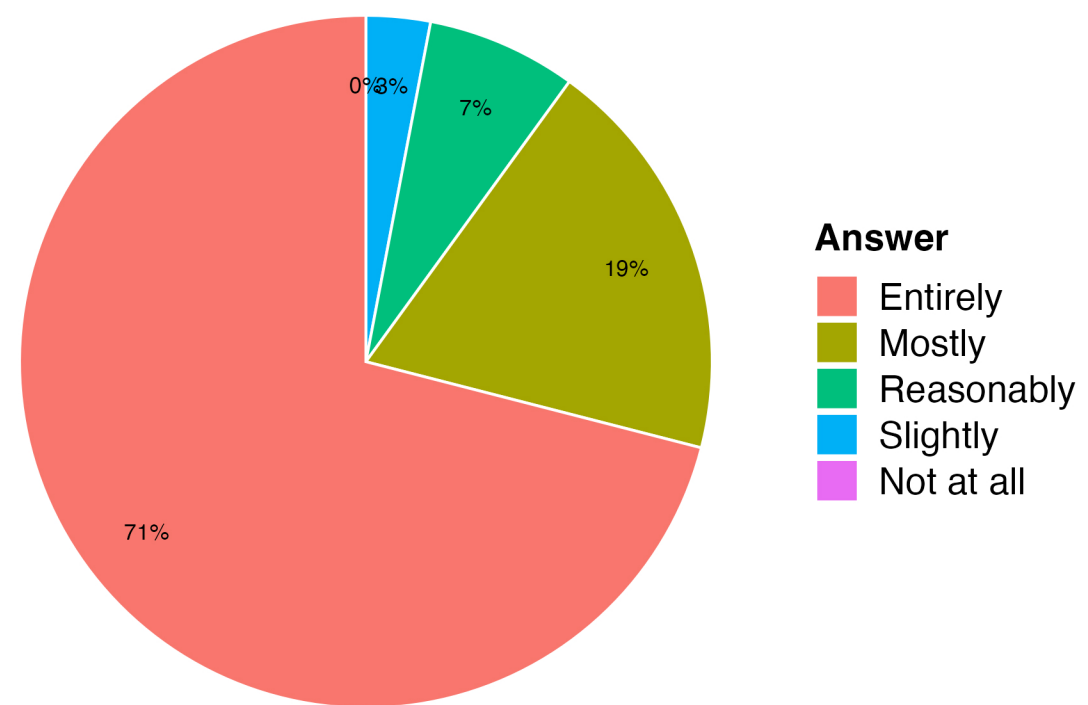

**B** Did you find the response options on your information need understandable?

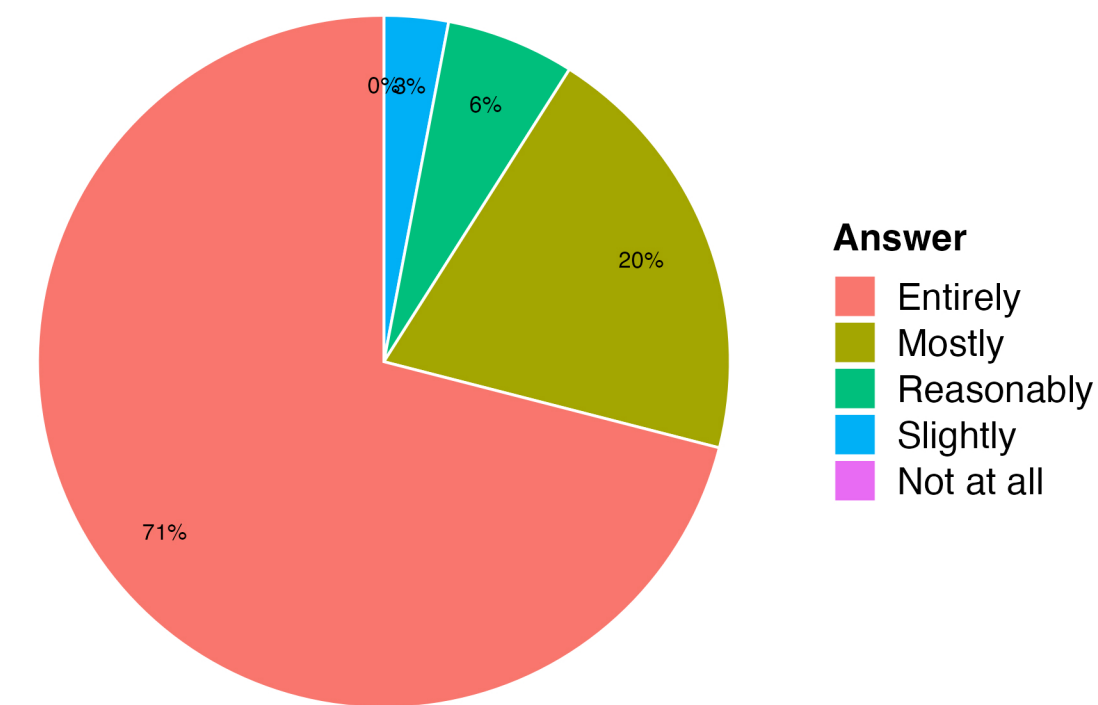

**C** Are the response options on your information need complete?

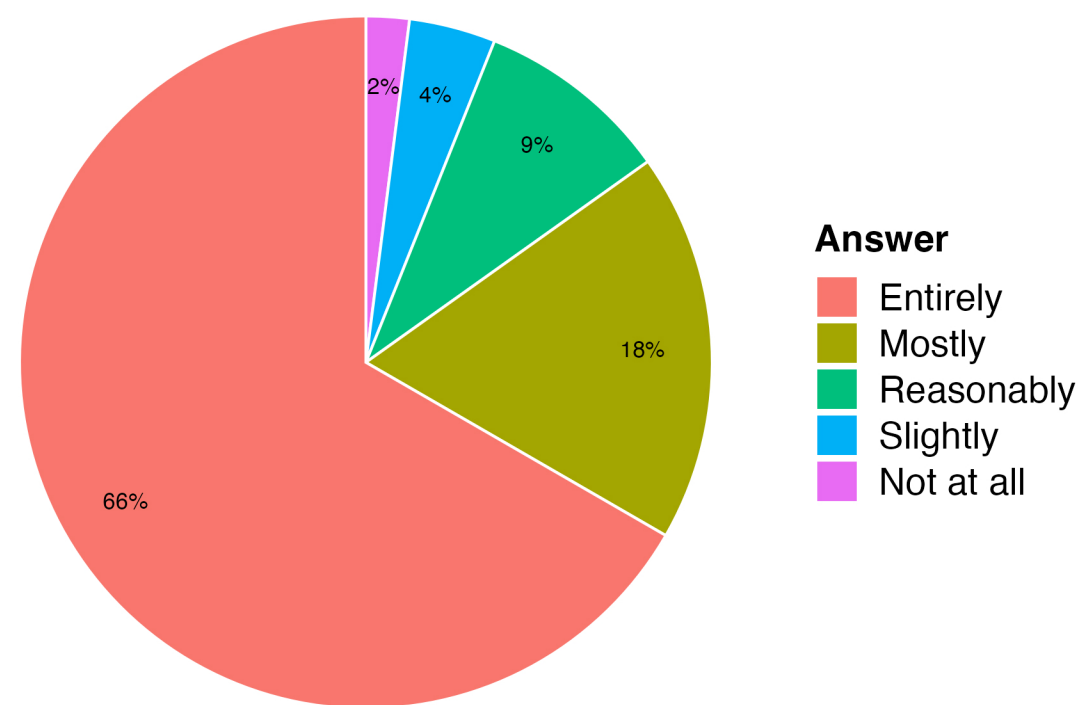

**D** Were the questions about your treatment goals understandable?

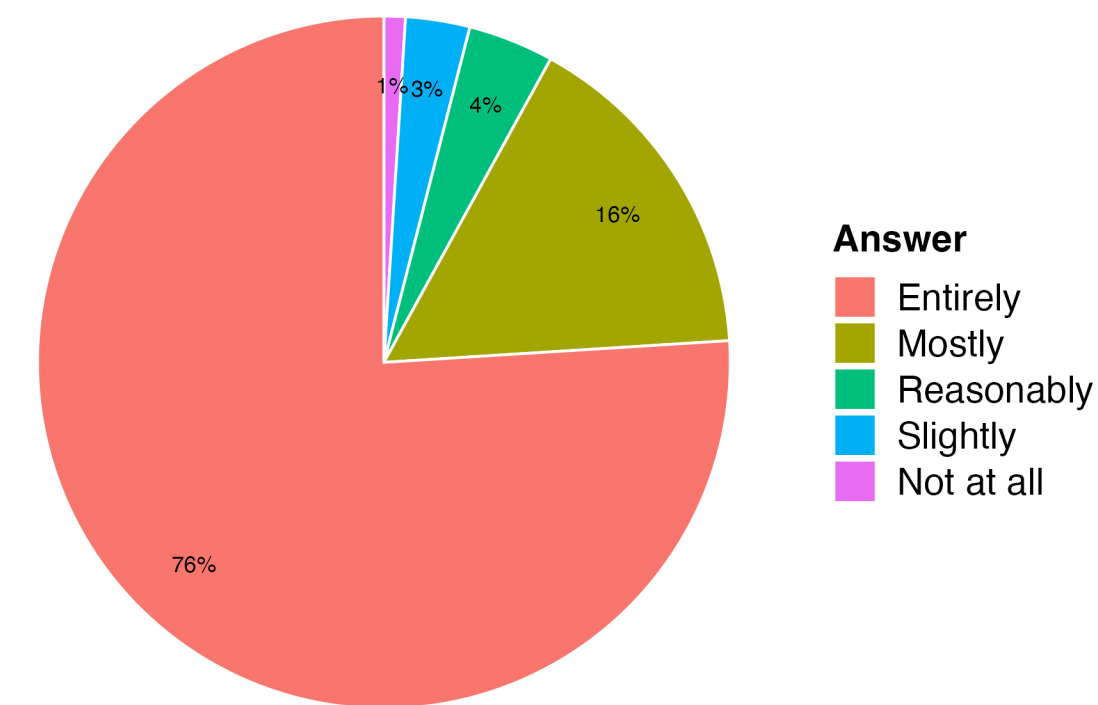

**E** Did you find the response options on your treatment goals understandable?

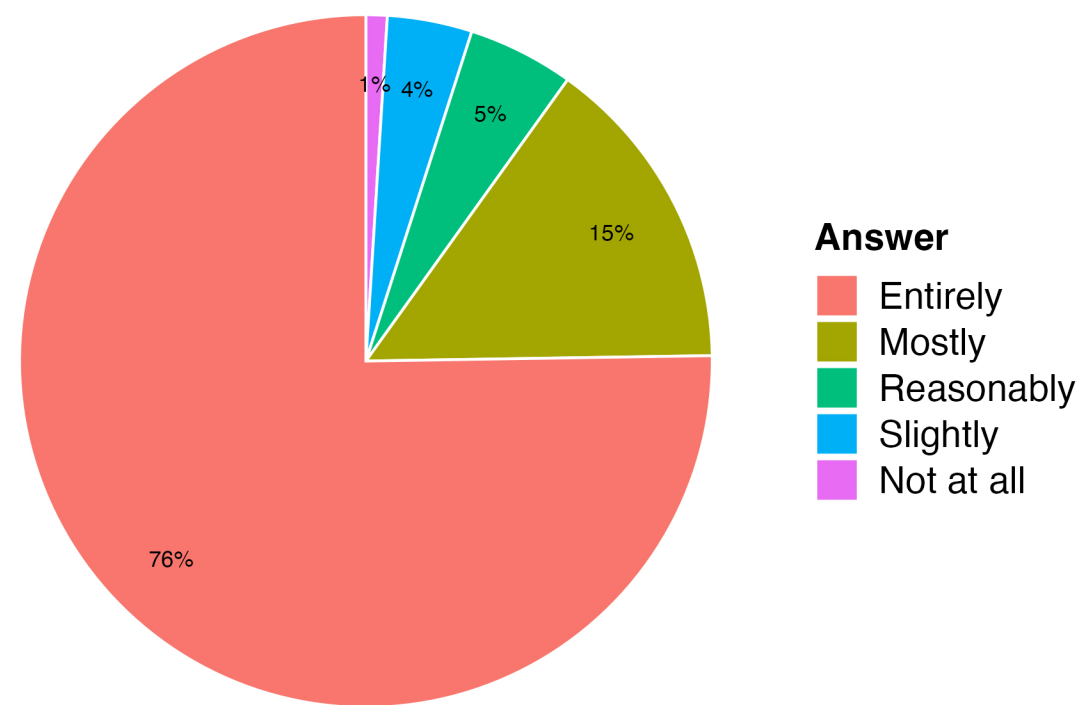

**F** Are the response options on your treatment goals complete?

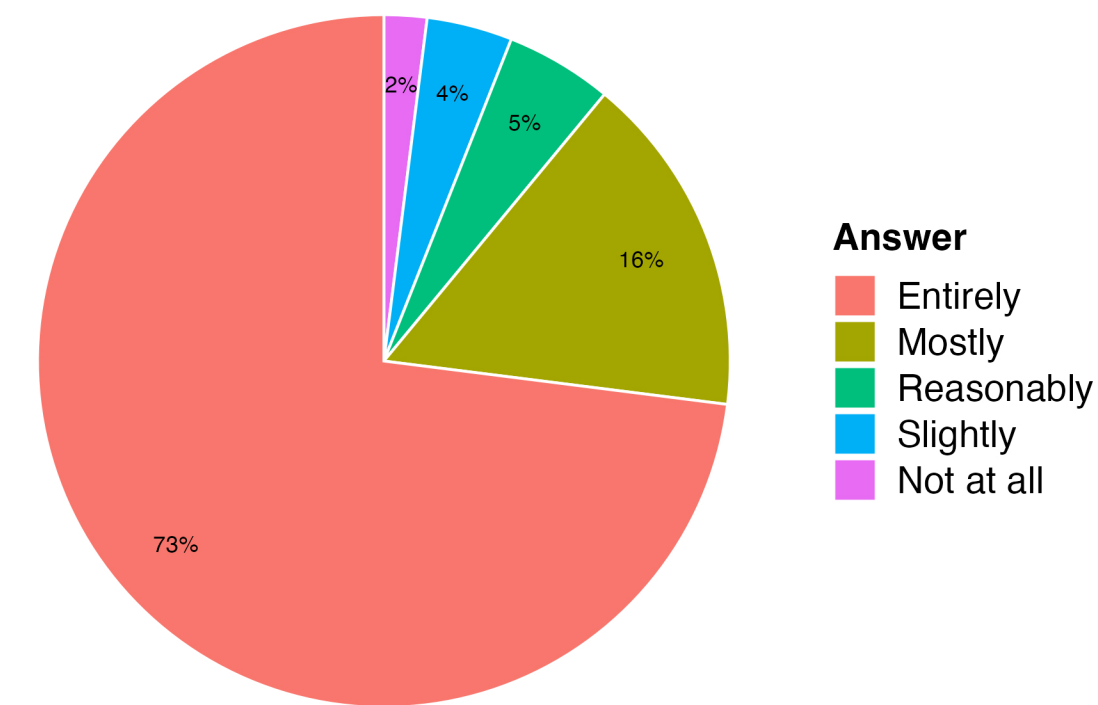

Supplement: prs-154-0787-s003.pdf [file prs-154-0787-s003.pdf]
