# Supplementary material for: Tailoring and Evaluating Treatment with the Patient-Specific Needs Evaluation: A Patient-Centered Approach
Source: PubMed Central journal article supplement (PMC11412570; doi:10.1097/prs.0000000000011199), 2023-12-12
Supplement: prs-154-0787-s004.pdf [file prs-154-0787-s004.pdf]

**Supplemental Digital Content 4.** Non-responder analysis for the test-retest study.

| <b>Variable</b>                                                                                | <b>Non-Responders<br/>(n = 37)</b> | <b>Responders<br/>(n = 102)</b> | <b>p-value*</b> | <b>SMD</b> |
|------------------------------------------------------------------------------------------------|------------------------------------|---------------------------------|-----------------|------------|
| Age, median [IQR]                                                                              | 53.00 [36.00, 63.00]               | 64.00 [51.25, 73.75]            | <0.001          | 0.691      |
| Sex = male, n (%)                                                                              | 13 (35.1)                          | 46 (45.1)                       | 0.392           | 0.204      |
| Duration of symptoms in months, median [IQR]                                                   | 12.00 [6.00, 28.00]                | 11.00 [5.00, 18.75]             | 0.171           | 0.305      |
| Type of work, n (%)                                                                            |                                    |                                 | 0.009           | 0.745      |
| Unemployed due retirement                                                                      | 6 (16.2)                           | 41 (40.2)                       |                 |            |
| Unemployed due other reason                                                                    | 4 (10.8)                           | 6 (5.9)                         |                 |            |
| Light physical labor (e.g., office work)                                                       | 10 (27.0)                          | 22 (21.6)                       |                 |            |
| Moderate physical labor (e.g., working in a store)                                             | 14 (37.8)                          | 16 (15.7)                       |                 |            |
| Heavy physical labor (e.g., working in construction)                                           | 3 (8.1)                            | 17 (16.7)                       |                 |            |
| Level of education (%)                                                                         |                                    |                                 | 0.950           | 0.328      |
| None                                                                                           | 1 (2.7)                            | 1 (1.0)                         |                 |            |
| Primary education (primary school, special primary education)                                  | 0 (0.0)                            | 1 (1.0)                         |                 |            |
| Primary or pre-vocational education (such as (in Dutch) LTS, LEAO, LHNO, Huishoudschool, VMBO) | 4 (10.8)                           | 12 (11.8)                       |                 |            |
| Secondary general secondary education (such as (in Dutch) MAVO, (M)ULO, MBO-short, VMBO-t)     | 6 (16.2)                           | 24 (23.5)                       |                 |            |

|                                                                                                                  |                      |                      |       |       |
|------------------------------------------------------------------------------------------------------------------|----------------------|----------------------|-------|-------|
| Secondary vocational education and vocational training (such as (in Dutch) MKBO-long, MTS, MEAO, BOL, BBL, INAS) | 8 (21.6)             | 20 (19.6)            |       |       |
| Higher general and pre-university education (such as (in Dutch) HAVO, VWO, Atheneum, Gymnasium, HBS, MMS)        | 2 (5.4)              | 9 (8.8)              |       |       |
| Higher vocational education (such as (in Dutch) HBO, HTS, HEAO, HBO-V, university graduates)                     | 9 (24.3)             | 21 (20.6)            |       |       |
| Scientific education (e.g., MSc.)                                                                                | 4 (10.8)             | 8 (7.8)              |       |       |
| Prefer not to say                                                                                                | 3 (8.1)              | 6 (5.9)              |       |       |
| Body Mass Index, median [IQR]                                                                                    | 26.00 [23.00, 28.00] | 26.00 [23.00, 29.00] | 0.617 | 0.042 |
| Smoking status, n (%)                                                                                            |                      |                      | 0.366 | 0.356 |
| Yes, daily smoker                                                                                                | 7 (18.9)             | 10 (9.8)             |       |       |
| Yes, passive smoker                                                                                              | 0 (0.0)              | 2 (2.0)              |       |       |
| Yes, sometimes                                                                                                   | 1 (2.7)              | 6 (5.9)              |       |       |
| No                                                                                                               | 29 (78.4)            | 84 (82.4)            |       |       |
| Affected side, n (%)                                                                                             |                      |                      | 0.953 | 0.059 |
| Left                                                                                                             | 13 (35.1)            | 33 (32.4)            |       |       |
| Right                                                                                                            | 14 (37.8)            | 40 (39.2)            |       |       |
| Both                                                                                                             | 10 (27.0)            | 29 (28.4)            |       |       |
| Dominance, n (%)                                                                                                 |                      |                      | 0.560 | 0.223 |

|                                     |           |            |       |       |
|-------------------------------------|-----------|------------|-------|-------|
| Left                                | 3 (8.1)   | 11 (10.8)  |       |       |
| Right                               | 33 (89.2) | 84 (82.4)  |       |       |
| Both                                | 1 (2.7)   | 7 (6.9)    |       |       |
| Second opinion = no, n (%)          | 34 (91.9) | 87 (85.3)  | 0.460 | 0.209 |
| Personal injury lawsuit = no, n (%) | 36 (97.3) | 100 (98.0) | 1.000 | 0.049 |

\*Continuous variables were compared using the Kruskal-Wallis Rank Sum Test and dichotomous or categorical variables using a Chi-Square test.
